# Supplementary material
Source: publisher figshare collection journal article supplement (https://gsajournals.figshare.com/ndownloader/files/13991165)
Supplement: Supplementary file 1 [file 13991165]

## Sheet: Sheet1
Table S11 Significantly (Q value < 0.05) enriched KEGG pathways among genes with high frequencies (>3%) of SNPs in M. baccata genome.
Pathway	Sample (1910)	Background (31067)	P-value	Q-value	Pathway ID
Spliceosome	92 (4.82%)	932 (3%)	5.20486e-06	0.000666222	ko03040
RNA polymerase	38 (1.99%)	295 (0.95%)	1.36124e-05	0.000871193	ko03020
Plant-pathogen interaction	126 (6.6%)	1508 (4.85%)	0.000277386	0.0118351	ko04626
Protein processing in endoplasmic reticulum	82 (4.29%)	920 (2.96%)	0.000489818	0.012792	ko04141
Ascorbate and aldarate metabolism	37 (1.94%)	340 (1.09%)	0.000566267	0.012792	ko00053
Isoquinoline alkaloid biosynthesis	21 (1.1%)	156 (0.5%)	0.000599624	0.012792	ko00950
Endocytosis	76 (3.98%)	870 (2.8%)	0.00134231	0.0245452	ko04144
